# Supplementary material for: Effect of Thermomechanical Treatment of Al-Zn-Mg-Cu with Minor Amount of Sc and Zr on the Mechanical Properties
Source: MDPI journal article supplement (doi:10.3390/ma15020589), 2022-01-13
Supplement: s1 [file s1]

*Supplementary Material*

# Effect of Thermomechanical Treatment of Al-Zn-Mg-Cu with Minor Amount of Sc and Zr on the Mechanical Properties

Azam Beigi Kheradmand<sup>1,\*</sup>, Shamseddin Mirdamadi<sup>2</sup>, Zahra Lalegani<sup>3</sup> and Bejan Hamawandi<sup>4,\*</sup>

<sup>1</sup> Department of Mechanical Engineering, Shahrekord Branch, Islamic Azad University, 88137-33395 Shahrekord, Iran

<sup>2</sup> Department of Materials Engineering, Science and Research Branch, Islamic Azad University, 82448-65179 Tehran, Iran; mirdamadi@iust.ac.ir

<sup>3</sup> Young Researchers and Elite Club, Shahrekord Branch, Islamic Azad University, 88137-33395 Shahrekord, Iran; z.lalegani@ut.ac.ir

<sup>4</sup> Department of Applied Physics, KTH Royal Institute of Technology, SE-10691 Stockholm, Sweden

\* Correspondence: kheradmand@iaushk.ac.ir (A.B.K.); bejan@kth.se (B.H.)

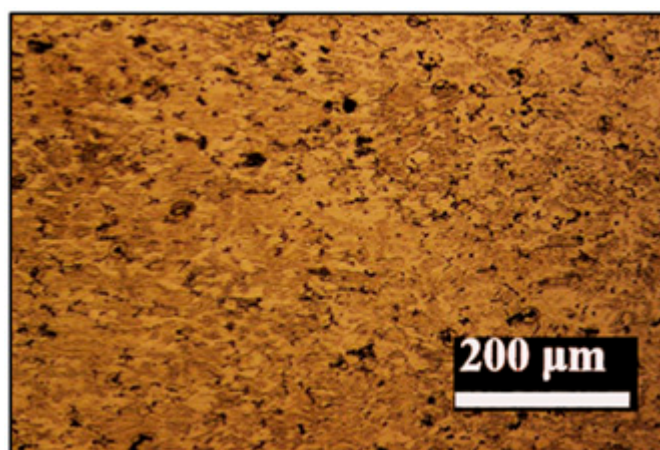

**Figure S1.** Metallographic image of alloy containing 0.1% Sc under thermomechanical treatment with conventional dissolution, after dissolution, and 50% deformation.

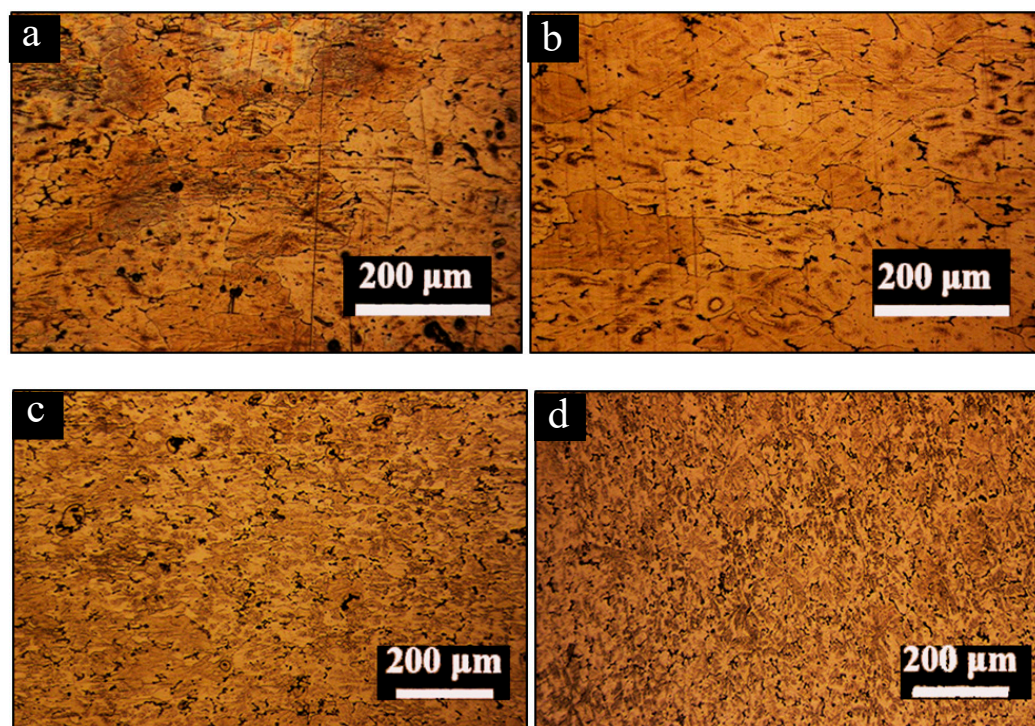

**Figure S2.** Metallographic image of alloy containing 0.1% Sc under thermomechanical treatment with controlled quenching: (a) after dissolution and 30% deformation, (b) ageing at 130°C, (c) after dissolution and 50% deformation, and (d) ageing at 120°C.

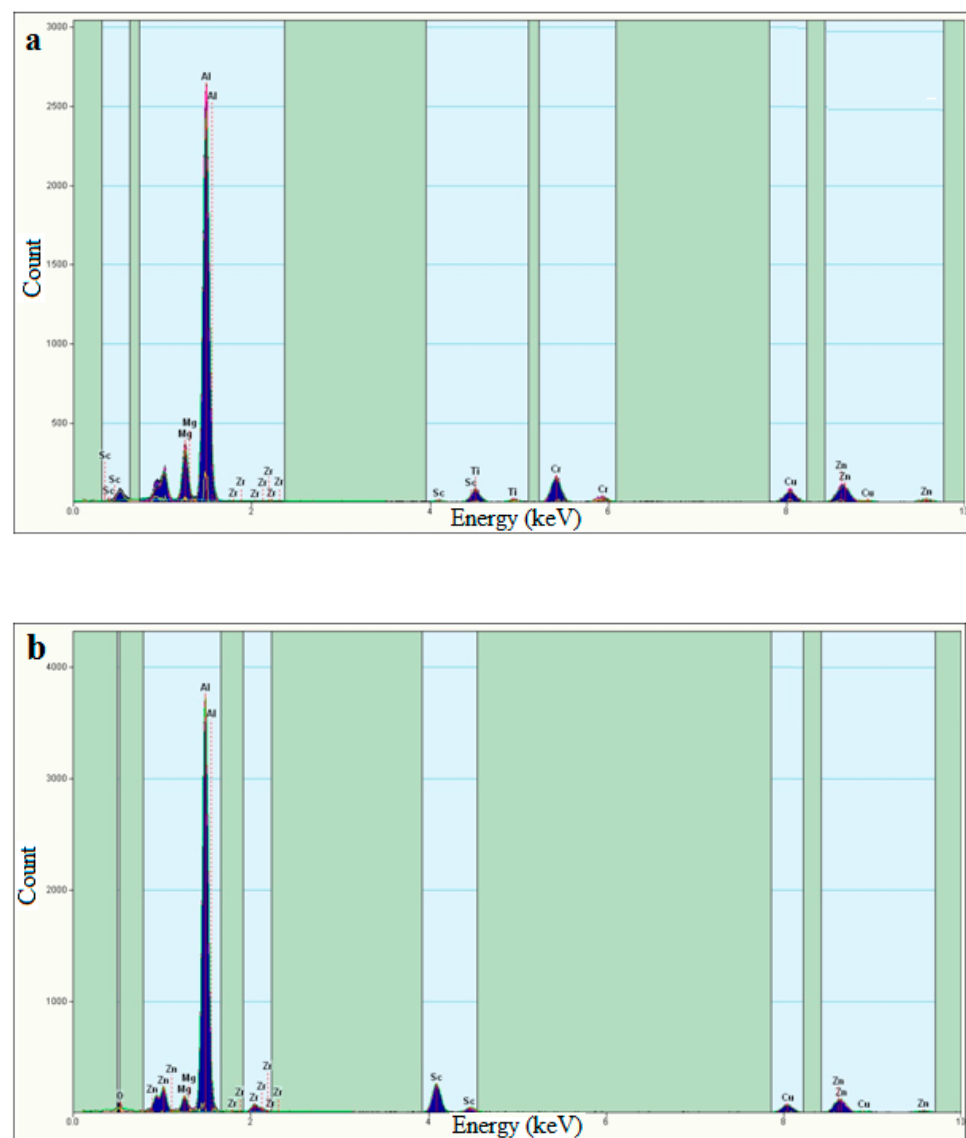

**Figure S3.** EDS analysis of dispersoids in the TEM micrograph given in figure 12: (a) spherical particles, and (b) rod particles.
